# Supplementary material for: Soft-templated synthesis of core–shell heterostructured Ni3S2@polypyrrole nanotube aerogels as anode materials for high-performance lithium ion batteries
Source: Royal Society of Chemistry journal article supplement (doi:10.1039/d1nj01841h), 2021-01-01
Supplement: d1nj01841h1.pdf [file d1nj01841h1.pdf]

Electronic Supplementary Material (ESI) for New Journal of Chemistry.

## Supporting Information

Soft-templated synthesis of core-shell heterostructured  
 $\text{Ni}_3\text{S}_2$ @polypyrrole nanotube aerogels as anode materials for  
high-performance lithium ion batteries

Bo Wang,<sup>\*a,b</sup> Yue Li,<sup>a,b</sup> Liyan Han,<sup>a</sup> Kun Liu,<sup>a</sup> Bin Hao,<sup>a</sup> and Xiaoyu Wu,<sup>\*c</sup>

<sup>a</sup> Department of Environmental and Chemical Engineering, Tangshan University,  
Tangshan 063000, P. R. China.

<sup>b</sup> State Key Laboratory of Metastable Materials Science and Technology,  
Yanshan University, Qinhuangdao 066004, P. R. China.

<sup>c</sup> Department of Chemistry, Southern University of Science and Technology  
(SUSTech), Shenzhen, 518055, P. R. China

\* Corresponding author. Tel: +86-315-2010649; Fax: +86-315-2010649.

E-mail address: wangbo@buaa.edu.cn.

E-mail address: wuxy3@sustech.edu.cn.

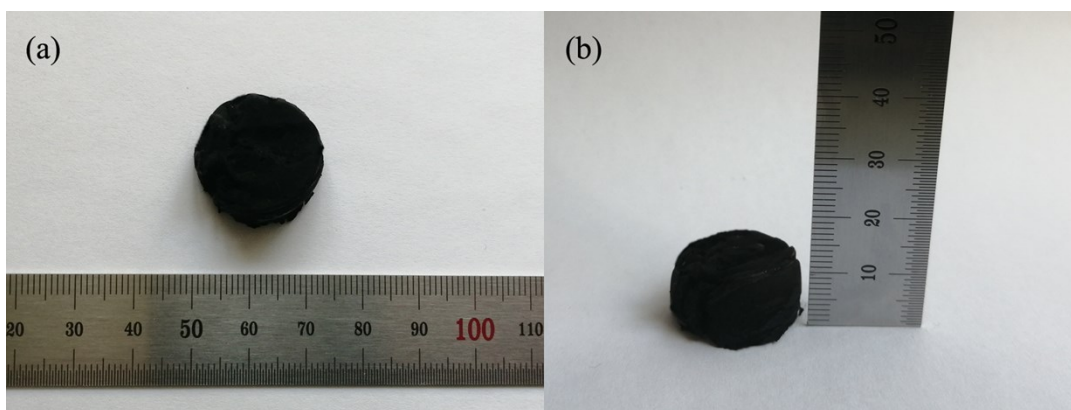

**Fig. S1** Digital photographs of  $\text{Ni}_3\text{S}_2@\text{PPy}$  nanotube aerogels.

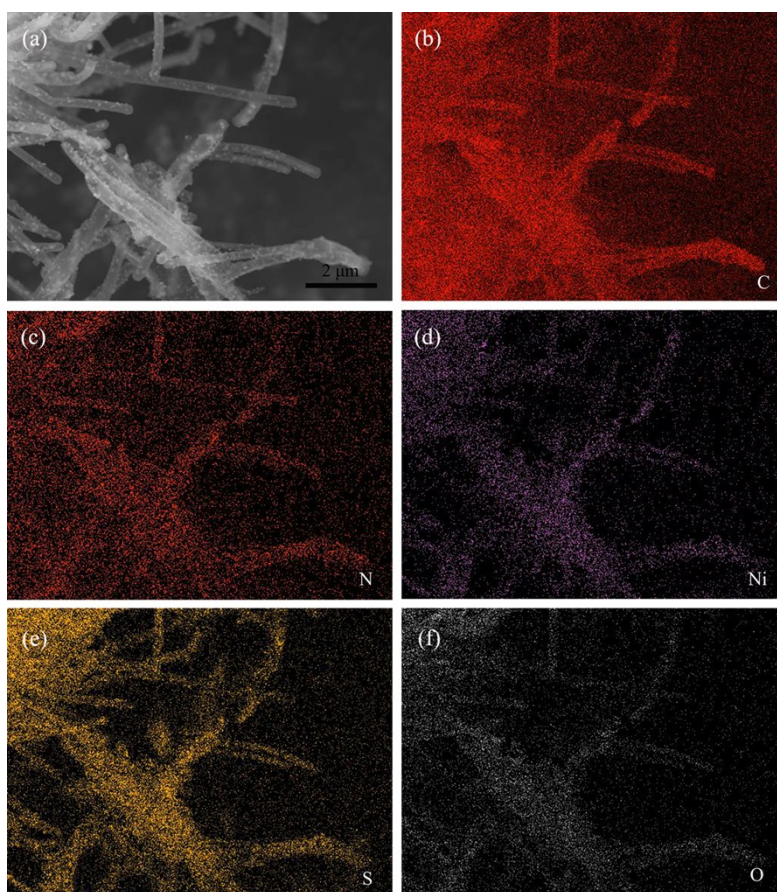

**Fig. S2** (a) SEM image of cross-sections of the  $\text{Ni}_3\text{S}_2@\text{PPy}$  nanotube aerogels; corresponding EDX elemental mapping of (b) carbon, (c) nitrogen, (d) nickel, (e) sulfur and (f) oxygen.

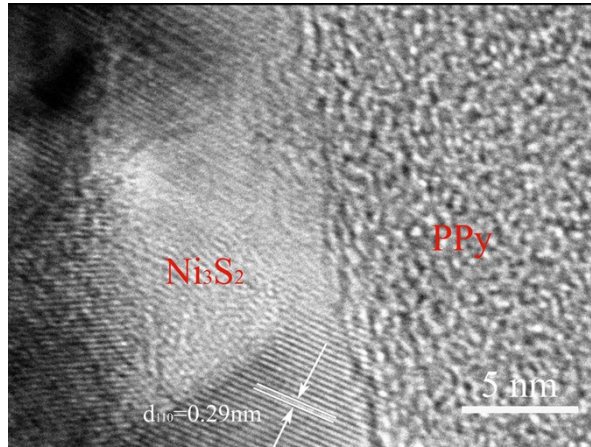

**Fig. S3** HRTEM image of the  $\text{Ni}_3\text{S}_2@\text{PPy}$  nanotube aerogels.

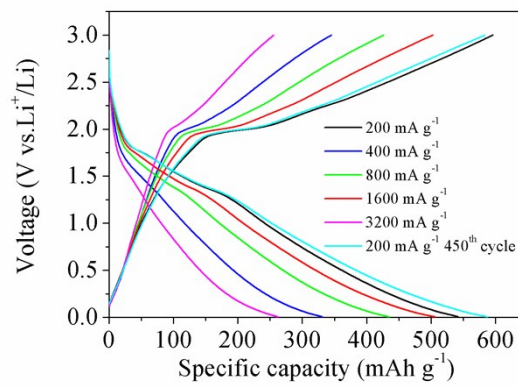

**Fig. S4** The typical charge-discharge curves of the  $\text{Ni}_3\text{S}_2@\text{PPy}$  electrode at various current densities in the range of 0.005-3.0V vs.  $\text{Li}/\text{Li}^+$ .
